# Supplementary material for: Molecular Dynamics Ensemble Refinement of Intrinsically Disordered Peptides According to Deconvoluted Spectra from Circular Dichroism
Source: PubMed Central journal article supplement (PMC7136346; doi:10.1016/j.bpj.2020.02.015), 2020-02-25
Supplement: mmc1.pdf [file mmc1.pdf]

**Biophysical Journal, Volume 118**

**Supplemental Information**

**Molecular Dynamics Ensemble Refinement of Intrinsically Disordered Peptides According to Deconvoluted Spectra from Circular Dichroism**

**Jacob C. Ezerski, Pengzhi Zhang, Nathaniel C. Jennings, M. Neal Waxham, and Margaret S. Cheung**

## SUPPLEMENTARY INFORMATION

### Tables:

**Table S1** The fractions of secondary structures from CAPITO deconvolution of the CD spectra for the CaMKII peptides. Normalized root mean squared deviation (NRMSD) is a dimensionless parameter to assess the goodness of the fitting as defined by Wiedemann et al. [1]

|     | helix | $\beta$ -sheet | irregular | NRMSD |
|-----|-------|----------------|-----------|-------|
| RRK | 0.32  | 0.01           | 0.68      | 1.55  |
| RAK | 0.21  | 0.01           | 0.78      | 0.73  |
| AAA | 0.53  | 0.06           | 0.41      | 0.89  |

**Table S2** Fractional secondary structures derived from CD deconvolution using the non-negative least squares fitting method in conjunction with the SDP48, SP37A, SMP56 and SP43 reference data sets. SDP48 is the data set including denatured proteins. Others include the data set of globular proteins.

| Data set | Peptide | Helix | Strand | Turn | Unordered | RMSD ( $\Delta\epsilon$ ) |
|----------|---------|-------|--------|------|-----------|---------------------------|
| SDP48    | RRK     | 0.04  | 0.15   | 0.09 | 0.72      | 0.26                      |
|          | RAK     | 0.04  | 0.21   | 0.13 | 0.62      | 0.23                      |
|          | AAA     | 0.04  | 0.34   | 0.17 | 0.46      | 0.36                      |
| SP37A    | RRK     | 0.11  | 0.35   | 0.20 | 0.34      | 2.14                      |
|          | RAK     | 0.11  | 0.35   | 0.20 | 0.34      | 0.97                      |
|          | AAA     | 0.08  | 0.39   | 0.22 | 0.32      | 0.65                      |
| SMP56    | RRK     | 0.11  | 0.35   | 0.20 | 0.34      | 2.14                      |
|          | RAK     | 0.11  | 0.35   | 0.20 | 0.34      | 0.97                      |
|          | AAA     | 0.09  | 0.39   | 0.20 | 0.32      | 0.64                      |
| SP43     | RRK     | 0.11  | 0.35   | 0.20 | 0.34      | 2.14                      |
|          | RAK     | 0.11  | 0.35   | 0.20 | 0.34      | 0.97                      |
|          | AAA     | 0.09  | 0.39   | 0.20 | 0.32      | 0.64                      |

**Table S3** Comparison of the structure ensembles of RRK, RAK, and AAA peptides. Root mean square deviation (RMSD) from the averaged structure is calculated for each peptide ensemble based on backbone heavy atoms. The average ( $\overline{\text{RMSD}}$ ), standard deviation ( $\sigma_{\text{RMSD}}$ ), the minimum ( $\text{RMSD}_{\text{min}}$ ), and maximum ( $\text{RMSD}_{\text{max}}$ ) values of the RMSD are provided.

|     | $\overline{\text{RMSD}}$ (Å) | $\sigma_{\text{RMSD}}$ (Å) | $\text{RMSD}_{\text{min}}$ (Å) | $\text{RMSD}_{\text{max}}$ (Å) | number of structures |
|-----|------------------------------|----------------------------|--------------------------------|--------------------------------|----------------------|
| RRK | 4.6                          | 1.4                        | 2.3                            | 12.5                           | 11002                |
| RAK | 4.3                          | 1.7                        | 2.1                            | 12.4                           | 2410                 |
| AAA | 4.7                          | 1.0                        | 3.5                            | 10.5                           | 130                  |

**Table S4** Sequence analysis of RRK, RAK and AAA using CIDER.

| peptide | $\kappa$ | FCR  | NCPR | hydropathy | disorder promoting |
|---------|----------|------|------|------------|--------------------|
| RRK     | 0.55     | 0.25 | 0.25 | 4.26       | 0.6                |
| RAK     | 0.383    | 0.2  | 0.2  | 4.575      | 0.6                |
| AAA     | 0.313    | 0.1  | 0.1  | 5.175      | 0.6                |

$\kappa$  represents an order parameter indicating charge segregation within the peptide; FCR is the fraction of charged residues; NCPR is the linear net charge per residue; hydropathy indicates hydrophobicity and ranges from 0 to 9; the fraction of disorder-promoting residues defined by Dunker [2] is provided.

**Table S5** Kullback-Leibler divergence between distributions of total potential energy of the peptides over accumulated simulation time.

| Peptide     | RRK  |      |      | RAK  |      |      | AAA  |      |      |
|-------------|------|------|------|------|------|------|------|------|------|
| Temp (K)    | 277  | 285  | 293  | 277  | 285  | 293  | 277  | 285  | 293  |
| 1.2 $\mu$ s | 0.10 | 0.06 | 0.02 | 0.03 | 0.02 | 0.05 | 0.08 | 0.02 | 0.02 |
| 1.8 $\mu$ s | 0.10 | 0.01 | 0.01 | 0.10 | 0.02 | 0.01 | 0.07 | 0.01 | 0.01 |
| 2.4 $\mu$ s | 0.04 | 0.01 | 0.01 | 0.06 | 0.01 | 0.01 | 0.04 | 0.01 | 0.01 |
| 3.0 $\mu$ s | 0.01 | N/A  |      | 0.03 | N/A  |      | 0.02 | N/A  |      |
| 3.6 $\mu$ s | 0.01 |      |      | 0.01 |      |      | 0.02 |      |      |
| 4.2 $\mu$ s | 0.01 |      |      | 0.01 |      |      | 0.02 |      |      |
| 4.8 $\mu$ s | 0.01 |      |      | 0.01 |      |      | 0.01 |      |      |

**Table S6** Details pertaining to the Hieragglo clusters produced by CPPTRAJ are shown for RRK, RAK, and AAA.

| peptide | # Cluster | # of frames | fraction | AvgDist (A) | Stdev (A) | Centroid | AvgCDist (A) |
|---------|-----------|-------------|----------|-------------|-----------|----------|--------------|
| RRK     | 0         | 7914        | 0.719    | 4.5         | 1.2       | 9925     | 8.2          |
|         | 1         | 2292        | 0.208    | 4.0         | 1.3       | 4519     | 7.7          |
|         | 2         | 171         | 0.016    | 4.8         | 1.3       | 5228     | 7.1          |
|         | 3         | 148         | 0.013    | 4.6         | 1.3       | 1796     | 7.0          |
|         | 4         | 135         | 0.012    | 5.2         | 1.2       | 2519     | 6.9          |
|         | 5         | 105         | 0.01     | 4.2         | 1.7       | 90       | 7.5          |
|         | 6         | 98          | 0.009    | 4.7         | 0.9       | 16       | 8.3          |
|         | 7         | 87          | 0.008    | 5.2         | 1.0       | 450      | 6.9          |
|         | 8         | 47          | 0.004    | 4.8         | 1.2       | 2366     | 7.4          |
|         | 9         | 5           | 0.0      | 4.3         | 1.3       | 10996    | 7.2          |
| RAK     | 0         | 1883        | 0.781    | 4.5         | 1.6       | 2042     | 7.7          |
|         | 1         | 197         | 0.082    | 4.9         | 1.2       | 284      | 7.1          |
|         | 2         | 109         | 0.045    | 4.7         | 1.1       | 186      | 8.3          |
|         | 3         | 104         | 0.043    | 4.4         | 1.8       | 1047     | 8.1          |
|         | 4         | 62          | 0.026    | 4.1         | 1.5       | 1421     | 7.2          |
|         | 5         | 25          | 0.01     | 4.1         | 1.4       | 608      | 7.0          |
|         | 6         | 14          | 0.006    | 4.2         | 1.3       | 175      | 7.4          |
|         | 7         | 6           | 0.002    | 4.5         | 0.8       | 166      | 7.0          |
|         | 8         | 5           | 0.002    | 4.7         | 1.3       | 233      | 6.9          |
|         | 9         | 5           | 0.002    | 3.5         | 1.0       | 1532     | 7.3          |
| AAA     | 0         | 59          | 0.454    | 2.1         | 0.8       | 70       | 6.6          |
|         | 1         | 27          | 0.208    | 2.5         | 0.9       | 19       | 6.2          |
|         | 2         | 25          | 0.192    | 2.4         | 0.9       | 41       | 5.5          |
|         | 3         | 9           | 0.069    | 1.5         | 0.5       | 52       | 6.0          |
|         | 4         | 3           | 0.023    | 1.1         | 0.1       | 28       | 5.9          |
|         | 5         | 3           | 0.023    | 1.9         | 0.3       | 128      | 5.5          |
|         | 6         | 1           | 0.008    | 0.0         | 0.0       | 124      | 6.9          |
|         | 7         | 1           | 0.008    | 0           | 0         | 125      | 6.5          |
|         | 8         | 1           | 0.008    | 0           | 0         | 126      | 5.4          |
|         | 9         | 1           | 0.008    | 0           | 0         | 130      | 6.9          |

**Table S7** Performance indices for varying subsets of unordered content indicated by a minimum structure content cutoff value. The number of proteins satisfying the cutoff criteria is given by column N. Cells highlighted in red indicate CDSSTR algorithms are the highest performing methods and cells highlighted in green indicate NN-LSQ is the best performing method.

| cut(unorder) | N   | Method    | $\sigma(H)$ | $r(H)$ | $\sigma(\beta)$ | $r(\beta)$ | $\sigma(T)$ | $r(T)$  | $\sigma(U)$ | $r(U)$  | $\sigma$ | $r$    |
|--------------|-----|-----------|-------------|--------|-----------------|------------|-------------|---------|-------------|---------|----------|--------|
| 0            | 411 | NN-LSQ    | 0.1223      | 0.6953 | 0.1064          | 0.6254     | 0.0623      | 0.3225  | 0.1064      | 0.1601  | 0.1018   | 0.6006 |
|              |     | SELCON3   | 0.1156      | 0.7023 | 0.0902          | 0.6455     | 0.0537      | 0.294   | 0.0863      | 0.2236  | 0.0892   | 0.7147 |
|              |     | CDSSTR    | 0.1196      | 0.7255 | 0.0855          | 0.7117     | 0.0604      | 0.2689  | 0.0963      | 0.2519  | 0.0929   | 0.7173 |
|              |     | CONTIN/LL | 0.1073      | 0.7632 | 0.0881          | 0.698      | 0.0557      | 0.2396  | 0.0921      | 0.244   | 0.0878   | 0.7286 |
| 0.1          | 409 | NN-LSQ    | 0.1213      | 0.6897 | 0.1062          | 0.6239     | 0.0623      | 0.3189  | 0.106       | 0.1505  | 0.1014   | 0.5962 |
|              |     | SELCON3   | 0.1147      | 0.696  | 0.0904          | 0.642      | 0.0518      | 0.31    | 0.0856      | 0.2205  | 0.0885   | 0.7119 |
|              |     | CDSSTR    | 0.119       | 0.7207 | 0.0856          | 0.7092     | 0.06        | 0.2692  | 0.0963      | 0.2318  | 0.0927   | 0.7122 |
|              |     | CONTIN/LL | 0.1064      | 0.7595 | 0.0883          | 0.6952     | 0.0552      | 0.2369  | 0.0919      | 0.2276  | 0.0874   | 0.7243 |
| 0.2          | 382 | NN-LSQ    | 0.1135      | 0.656  | 0.1024          | 0.6206     | 0.0631      | 0.2836  | 0.1047      | 0.0967  | 0.0979   | 0.561  |
|              |     | SELCON3   | 0.1137      | 0.599  | 0.0868          | 0.6354     | 0.0507      | 0.1805  | 0.0866      | 0.0808  | 0.0874   | 0.6555 |
|              |     | CDSSTR    | 0.1158      | 0.6295 | 0.0826          | 0.7097     | 0.0582      | 0.1305  | 0.0978      | 0.0368  | 0.0911   | 0.6511 |
|              |     | CONTIN/LL | 0.1076      | 0.6698 | 0.0881          | 0.6615     | 0.0531      | 0.1002  | 0.0934      | 0.0859  | 0.0879   | 0.6582 |
| 0.3          | 31  | NN-LSQ    | 0.101       | 0.8088 | 0.0949          | 0.7596     | 0.0801      | -0.0088 | 0.2653      | -0.1158 | 0.1549   | 0.5588 |
|              |     | SELCON3   | 0.1666      | 0.6069 | 0.1163          | 0.6399     | 0.0565      | 0.4048  | 0.2631      | -0.2124 | 0.1686   | 0.4654 |
|              |     | CDSSTR    | 0.1686      | 0.7112 | 0.0964          | 0.7513     | 0.0647      | 0.3546  | 0.2836      | -0.1656 | 0.1749   | 0.4766 |
|              |     | CONTIN/LL | 0.1274      | 0.7705 | 0.097           | 0.7864     | 0.0872      | -0.0871 | 0.2837      | -0.2301 | 0.1686   | 0.5025 |
| 0.4          | 10  | NN-LSQ    | 0.079       | 0.8621 | 0.1032          | 0.6008     | 0.1256      | -0.6799 | 0.4481      | -0.5362 | 0.2416   | 0.4066 |
|              |     | SELCON3   | 0.2378      | 0.2569 | 0.155           | 0.0611     | 0.0732      | 0.2234  | 0.4434      | -0.4839 | 0.2658   | 0.203  |
|              |     | CDSSTR    | 0.2213      | 0.4954 | 0.1025          | 0.5432     | 0.086       | -0.0818 | 0.4664      | -0.4174 | 0.2667   | 0.2552 |
|              |     | CONTIN/LL | 0.1525      | 0.6468 | 0.1197          | 0.516      | 0.136       | -0.7972 | 0.4739      | -0.5733 | 0.2649   | 0.2813 |
| 0.5          | 3   | NN-LSQ    | 0.0938      | 0.9636 | 0.0984          | -0.9721    | 0.0536      | 0.9672  | 0.7507      | 0.9204  | 0.3824   | 0.4693 |
|              |     | SELCON3   | 0.159       | 0.6424 | 0.0957          | -0.7226    | 0.0593      | 0.4159  | 0.7767      | 0.5898  | 0.4004   | 0.236  |
|              |     | CDSSTR    | 0.2305      | 0.6337 | 0.0797          | -0.6898    | 0.0953      | 0.5752  | 0.7986      | 0.6375  | 0.4202   | 0.152  |
|              |     | CONTIN/LL | 0.1913      | 0.618  | 0.0945          | -0.7393    | 0.0615      | 0.5737  | 0.7984      | 0.4635  | 0.4144   | 0.1531 |



**Table S8** Performance indices for varying subsets of beta content indicated by a minimum structure content cutoff value. The number of proteins satisfying the cutoff criteria is given by column N. Cells highlighted in red indicate CDPPro algorithms are the highest performing methods and cells highlighted in green indicate NN-LSQ is the best performing method.

| cut(Strand) | N   | Method    | $\sigma(H)$ | $r(H)$  | $\sigma(\beta)$ | $r(\beta)$ | $\sigma(T)$ | $r(T)$  | $\sigma(U)$ | $r(U)$  | $\sigma$ | $r$    |
|-------------|-----|-----------|-------------|---------|-----------------|------------|-------------|---------|-------------|---------|----------|--------|
| 0           | 411 | NN-LSQ    | 0.1223      | 0.6953  | 0.1064          | 0.6254     | 0.0623      | 0.3225  | 0.1064      | 0.1601  | 0.1018   | 0.6006 |
|             |     | SELCON3   | 0.1156      | 0.7023  | 0.0902          | 0.6455     | 0.0537      | 0.294   | 0.0863      | 0.2236  | 0.0892   | 0.7147 |
|             |     | CDSSTR    | 0.1196      | 0.7255  | 0.0855          | 0.7117     | 0.0604      | 0.2689  | 0.0963      | 0.2519  | 0.0929   | 0.7173 |
|             |     | CONTIN/LL | 0.1073      | 0.7632  | 0.0881          | 0.698      | 0.0557      | 0.2396  | 0.0921      | 0.244   | 0.0878   | 0.7286 |
| 0.1         | 362 | NN-LSQ    | 0.113       | 0.6376  | 0.106           | 0.5707     | 0.0626      | -0.069  | 0.1066      | 0.0882  | 0.0991   | 0.5114 |
|             |     | SELCON3   | 0.1188      | 0.5111  | 0.0936          | 0.5689     | 0.0467      | 0.0064  | 0.0869      | 0.1162  | 0.0903   | 0.5952 |
|             |     | CDSSTR    | 0.1195      | 0.5548  | 0.0889          | 0.6485     | 0.0514      | -0.0428 | 0.0948      | 0.1028  | 0.0919   | 0.6067 |
|             |     | CONTIN/LL | 0.1095      | 0.6211  | 0.0921          | 0.6312     | 0.048       | -0.0702 | 0.0925      | 0.1473  | 0.0885   | 0.6195 |
| 0.2         | 58  | NN-LSQ    | 0.0878      | 0.6399  | 0.1151          | 0.6107     | 0.0571      | 0.0995  | 0.0892      | 0.365   | 0.0897   | 0.7253 |
|             |     | SELCON3   | 0.1462      | 0.3413  | 0.1412          | 0.5324     | 0.0669      | 0.0429  | 0.0938      | 0.3107  | 0.1168   | 0.5429 |
|             |     | CDSSTR    | 0.1315      | 0.4752  | 0.1201          | 0.5896     | 0.0557      | 0.2898  | 0.0862      | 0.4486  | 0.1028   | 0.6633 |
|             |     | CONTIN/LL | 0.1032      | 0.556   | 0.1169          | 0.6527     | 0.0742      | -0.2346 | 0.1062      | 0.4373  | 0.1014   | 0.6769 |
| 0.3         | 42  | NN-LSQ    | 0.0922      | 0.4555  | 0.1288          | 0.5183     | 0.0592      | 0.0527  | 0.087       | 0.4293  | 0.0951   | 0.7644 |
|             |     | SELCON3   | 0.1648      | -0.0426 | 0.1584          | 0.282      | 0.0578      | 0.2556  | 0.0977      | 0.3222  | 0.1276   | 0.5595 |
|             |     | CDSSTR    | 0.1445      | 0.0452  | 0.1285          | 0.4957     | 0.0595      | 0.2715  | 0.0921      | 0.4674  | 0.1112   | 0.6826 |
|             |     | CONTIN/LL | 0.1125      | 0.0946  | 0.1265          | 0.5406     | 0.079       | -0.216  | 0.1096      | 0.4625  | 0.1083   | 0.7024 |
| 0.4         | 23  | NN-LSQ    | 0.0782      | 0.4687  | 0.1519          | 0.1128     | 0.0662      | -0.3074 | 0.0916      | 0.1556  | 0.1024   | 0.8132 |
|             |     | SELCON3   | 0.1897      | 0.0128  | 0.2007          | 0.2033     | 0.0562      | 0.4744  | 0.0973      | 0.0146  | 0.149    | 0.536  |
|             |     | CDSSTR    | 0.1582      | 0.0748  | 0.1526          | 0.1849     | 0.0595      | 0.4935  | 0.0903      | -0.1077 | 0.1225   | 0.7038 |
|             |     | CONTIN/LL | 0.108       | 0.0064  | 0.1489          | 0.1324     | 0.0937      | -0.3867 | 0.1228      | -0.0335 | 0.1201   | 0.7204 |
| 0.5         | 7   | NN-LSQ    | 0.0925      | 0.0935  | 0.2384          | -0.1961    | 0.0716      | 0.6353  | 0.1223      | 0.461   | 0.1462   | 0.7712 |
|             |     | SELCON3   | 0.206       | 0.7873  | 0.265           | 0.3653     | 0.0862      | 0.4311  | 0.079       | 0.1478  | 0.1777   | 0.5785 |
|             |     | CDSSTR    | 0.1785      | 0.8185  | 0.232           | 0.3343     | 0.0884      | 0.3004  | 0.0614      | 0.1436  | 0.1559   | 0.7061 |
|             |     | CONTIN/LL | 0.0956      | 0.883   | 0.1888          | 0.5545     | 0.1081      | -0.4405 | 0.0976      | 0.3249  | 0.1285   | 0.8417 |

**Table S9** Performance indices for varying subsets of helix content indicated by a minimum structure content cutoff value. The number of proteins satisfying the cutoff criteria is given by column N. Cells highlighted in red indicate CDPro algorithms are the best performing methods.

| cut(Helix) | N   | Method    | $\sigma(H)$ | $r(H)$  | $\sigma(\beta)$ | $r(\beta)$ | $\sigma(T)$ | $r(T)$  | $\sigma(U)$ | $r(U)$  | $\sigma$ | $r$    |
|------------|-----|-----------|-------------|---------|-----------------|------------|-------------|---------|-------------|---------|----------|--------|
| 0          | 411 | NN-LSQ    | 0.1223      | 0.6953  | 0.1064          | 0.6254     | 0.0623      | 0.3225  | 0.1064      | 0.1601  | 0.1018   | 0.6006 |
|            |     | SELCON3   | 0.1156      | 0.7023  | 0.0902          | 0.6455     | 0.0537      | 0.294   | 0.0863      | 0.2236  | 0.0892   | 0.7147 |
|            |     | CDSSTR    | 0.1196      | 0.7255  | 0.0855          | 0.7117     | 0.0604      | 0.2689  | 0.0963      | 0.2519  | 0.0929   | 0.7173 |
|            |     | CONTIN/LL | 0.1073      | 0.7632  | 0.0881          | 0.698      | 0.0557      | 0.2396  | 0.0921      | 0.244   | 0.0878   | 0.7286 |
| 0.3        | 349 | NN-LSQ    | 0.1284      | 0.5175  | 0.1051          | 0.4096     | 0.06        | 0.4654  | 0.1059      | 0.0661  | 0.1029   | 0.5835 |
|            |     | SELCON3   | 0.1095      | 0.7455  | 0.079           | 0.4808     | 0.0492      | 0.3902  | 0.0851      | 0.1833  | 0.0835   | 0.749  |
|            |     | CDSSTR    | 0.1178      | 0.7344  | 0.0789          | 0.5047     | 0.0593      | 0.3481  | 0.0965      | 0.2099  | 0.0907   | 0.7298 |
|            |     | CONTIN/LL | 0.1094      | 0.7416  | 0.0828          | 0.4907     | 0.0492      | 0.4211  | 0.0874      | 0.1843  | 0.085    | 0.7418 |
| 0.4        | 60  | NN-LSQ    | 0.1754      | 0.4266  | 0.1072          | 0.382      | 0.0561      | 0.8437  | 0.1026      | 0.2175  | 0.1183   | 0.7966 |
|            |     | SELCON3   | 0.1019      | 0.8184  | 0.0626          | 0.5809     | 0.0841      | 0.6933  | 0.0788      | 0.3919  | 0.083    | 0.9123 |
|            |     | CDSSTR    | 0.1307      | 0.7961  | 0.0582          | 0.6292     | 0.0975      | 0.7272  | 0.0991      | 0.4106  | 0.0997   | 0.9033 |
|            |     | CONTIN/LL | 0.1024      | 0.7996  | 0.0592          | 0.5723     | 0.0881      | 0.7568  | 0.0855      | 0.465   | 0.0852   | 0.9111 |
| 0.5        | 29  | NN-LSQ    | 0.2175      | 0.0229  | 0.1313          | 0.0433     | 0.0431      | 0.3811  | 0.1121      | 0.1085  | 0.1405   | 0.8237 |
|            |     | SELCON3   | 0.0956      | 0.6264  | 0.0473          | 0.4151     | 0.0772      | -0.1275 | 0.0753      | 0.3274  | 0.0758   | 0.9557 |
|            |     | CDSSTR    | 0.1428      | 0.5189  | 0.0556          | 0.3421     | 0.0786      | 0.1437  | 0.0994      | 0.5186  | 0.0994   | 0.9474 |
|            |     | CONTIN/LL | 0.0969      | 0.5642  | 0.0453          | 0.4476     | 0.0676      | 0.1969  | 0.0663      | 0.5269  | 0.0714   | 0.9611 |
| 0.6        | 18  | NN-LSQ    | 0.251       | 0.125   | 0.1415          | 0.5355     | 0.042       | 0.2448  | 0.1176      | 0.213   | 0.157    | 0.8304 |
|            |     | SELCON3   | 0.1089      | 0.3133  | 0.0378          | 0.1845     | 0.0946      | -0.5374 | 0.0765      | 0.1061  | 0.0838   | 0.957  |
|            |     | CDSSTR    | 0.1509      | 0.1306  | 0.0482          | 0.2191     | 0.0864      | -0.037  | 0.0936      | 0.2677  | 0.1016   | 0.9577 |
|            |     | CONTIN/LL | 0.1056      | 0.173   | 0.0308          | 0.4261     | 0.0809      | -0.145  | 0.0579      | 0.3976  | 0.0742   | 0.9663 |
| 0.7        | 8   | NN-LSQ    | 0.2755      | 0.1155  | 0.1265          | 0.3087     | 0.0348      | 0.1753  | 0.1516      | 0.0521  | 0.1704   | 0.8552 |
|            |     | SELCON3   | 0.1138      | -0.2914 | 0.046           | 0.2832     | 0.0531      | -0.1667 | 0.0866      | -0.4144 | 0.0797   | 0.9649 |
|            |     | CDSSTR    | 0.1356      | -0.3952 | 0.0506          | 0.4432     | 0.0743      | -0.6562 | 0.0718      | -0.1813 | 0.0889   | 0.9664 |
|            |     | CONTIN/LL | 0.1067      | -0.4052 | 0.0361          | 0.6878     | 0.0673      | -0.2457 | 0.0688      | -0.1383 | 0.0741   | 0.9685 |

**Table S10** Performance indices for varying subsets of turn content indicated by a minimum structure content cutoff value. The number of proteins satisfying the cutoff criteria is given by column N. Cells highlighted in red indicate CDPro algorithms are the highest performing methods and cells highlighted in green indicate NN-LSQ is the best performing method.

| cut(Turn) | N   | Method    | $\sigma(H)$ | r(H)   | $\sigma(\beta)$ | r( $\beta$ ) | $\sigma(T)$ | r(T)    | $\sigma(U)$ | r(U)    | $\sigma$ | r      |
|-----------|-----|-----------|-------------|--------|-----------------|--------------|-------------|---------|-------------|---------|----------|--------|
| 0         | 411 | NN-LSQ    | 0.1223      | 0.6953 | 0.1064          | 0.6254       | 0.0623      | 0.3225  | 0.1064      | 0.1601  | 0.1018   | 0.6006 |
|           |     | SELCON3   | 0.1156      | 0.7023 | 0.0902          | 0.6455       | 0.0537      | 0.294   | 0.0863      | 0.2236  | 0.0892   | 0.7147 |
|           |     | CDSSTR    | 0.1196      | 0.7255 | 0.0855          | 0.7117       | 0.0604      | 0.2689  | 0.0963      | 0.2519  | 0.0929   | 0.7173 |
|           |     | CONTIN/LL | 0.1073      | 0.7632 | 0.0881          | 0.698        | 0.0557      | 0.2396  | 0.0921      | 0.244   | 0.0878   | 0.7286 |
| 0.1       | 402 | NN-LSQ    | 0.1232      | 0.6707 | 0.1059          | 0.5997       | 0.0611      | 0.3253  | 0.1067      | 0.1582  | 0.1019   | 0.5795 |
|           |     | SELCON3   | 0.1099      | 0.729  | 0.0859          | 0.6544       | 0.0528      | 0.2288  | 0.0854      | 0.2365  | 0.0859   | 0.7226 |
|           |     | CDSSTR    | 0.1157      | 0.7373 | 0.083           | 0.7097       | 0.0594      | 0.2168  | 0.0938      | 0.2802  | 0.0903   | 0.7202 |
|           |     | CONTIN/LL | 0.1063      | 0.7619 | 0.0869          | 0.683        | 0.0523      | 0.2454  | 0.0895      | 0.2758  | 0.086    | 0.7271 |
| 0.2       | 207 | NN-LSQ    | 0.1029      | 0.6945 | 0.1006          | 0.6267       | 0.0796      | 0.4874  | 0.1335      | 0.1467  | 0.1059   | 0.4636 |
|           |     | SELCON3   | 0.0927      | 0.6837 | 0.0774          | 0.7          | 0.0628      | 0.0373  | 0.1121      | 0.101   | 0.0882   | 0.6393 |
|           |     | CDSSTR    | 0.098       | 0.6848 | 0.0724          | 0.7553       | 0.0757      | 0.0866  | 0.1229      | 0.0434  | 0.0945   | 0.6235 |
|           |     | CONTIN/LL | 0.0914      | 0.7171 | 0.0805          | 0.7055       | 0.0636      | -0.0783 | 0.1203      | 0.0946  | 0.0913   | 0.6309 |
| 0.3       | 20  | NN-LSQ    | 0.0866      | 0.6613 | 0.0617          | 0.8478       | 0.0912      | -0.2969 | 0.094       | 0.1072  | 0.0844   | 0.736  |
|           |     | SELCON3   | 0.0829      | 0.7039 | 0.0712          | 0.777        | 0.1307      | -0.7941 | 0.1053      | -0.6129 | 0.1001   | 0.6196 |
|           |     | CDSSTR    | 0.0792      | 0.7744 | 0.0714          | 0.8433       | 0.1397      | -0.1234 | 0.1146      | 0.0775  | 0.1049   | 0.6258 |
|           |     | CONTIN/LL | 0.0819      | 0.6846 | 0.0663          | 0.8479       | 0.1366      | -0.6951 | 0.1216      | 0.2223  | 0.1055   | 0.5872 |

**Table S11 PCDDB entries for the selected CD spectra. The 411 spectra are for proteins with known PDB entries.**

|              |               |              |              |              |              |              |              |
|--------------|---------------|--------------|--------------|--------------|--------------|--------------|--------------|
| CD000001000  | CD0000055000  | CD0001158000 | CD0003670000 | CD0003992009 | CD0003996005 | CD0004000001 | CD0004003011 |
| CD0000002000 | CD0000056000  | CD0001159000 | CD0003671000 | CD0003992010 | CD0003996006 | CD0004000002 | CD0004003012 |
| CD0000003000 | CD0000057000  | CD0001160000 | CD0003672000 | CD0003992011 | CD0003996007 | CD0004000003 | CD0004003013 |
| CD0000004000 | CD0000058000  | CD0001161000 | CD0003675000 | CD0003992012 | CD0003996008 | CD0004000004 | CD0004004000 |
| CD0000005000 | CD0000059000  | CD0001162000 | CD0003675001 | CD0003992013 | CD0003996009 | CD0004000005 | CD0004004001 |
| CD0000006000 | CD0000060000  | CD0001163000 | CD0003675002 | CD0003993000 | CD0003996010 | CD0004000006 | CD0004004002 |
| CD0000007000 | CD0000061000  | CD0001164000 | CD0003675003 | CD0003993001 | CD0003996011 | CD0004000007 | CD0004004003 |
| CD0000008000 | CD0000062000  | CD0001165000 | CD0003675004 | CD0003993002 | CD0003996012 | CD0004000008 | CD0004004004 |
| CD0000009000 | CD0000063000  | CD0001166000 | CD0003675005 | CD0003993003 | CD0003996013 | CD0004000009 | CD0004004005 |
| CD0000010000 | CD0000064000  | CD0001167000 | CD0003675006 | CD0003993004 | CD0003997000 | CD0004000010 | CD0004004006 |
| CD0000011000 | CD0000065000  | CD0001168000 | CD0003675007 | CD0003993005 | CD0003997001 | CD0004000011 | CD0004004007 |
| CD0000012000 | CD0000067000  | CD0001169000 | CD0003675008 | CD0003993006 | CD0003997002 | CD0004000012 | CD0004004008 |
| CD0000013000 | CD0000068000  | CD0001170000 | CD0003675009 | CD0003993007 | CD0003997003 | CD0004000013 | CD0004004009 |
| CD0000014000 | CD0000069000  | CD0001171000 | CD0003675010 | CD0003993008 | CD0003997004 | CD0004001000 | CD0004004010 |
| CD0000015000 | CD0000070000  | CD0001172000 | CD0003675011 | CD0003993009 | CD0003997005 | CD0004001001 | CD0004004012 |
| CD0000016000 | CD0000071000  | CD0001173000 | CD0003675012 | CD0003993010 | CD0003997006 | CD0004001002 | CD0004004013 |
| CD0000017000 | CD0000099000  | CD0001174000 | CD0003675013 | CD0003993011 | CD0003997007 | CD0004001003 | CD0004005000 |
| CD0000018000 | CD0000100000  | CD0001175000 | CD0003690000 | CD0003993012 | CD0003997008 | CD0004001004 | CD0004005001 |
| CD0000019000 | CD0000101000  | CD0001176000 | CD0003889000 | CD0003993013 | CD0003997009 | CD0004001005 | CD0004005002 |
| CD0000020000 | CD0000102000  | CD0001177000 | CD0003890000 | CD0003994000 | CD0003997010 | CD0004001006 | CD0004005003 |
| CD0000021000 | CD0000103000  | CD0001178000 | CD0003891000 | CD0003994001 | CD0003997011 | CD0004001007 | CD0004005004 |
| CD0000022000 | CD0000104000  | CD0001179000 | CD0003892000 | CD0003994002 | CD0003997012 | CD0004001008 | CD0004005005 |
| CD0000023000 | CD0000105000  | CD0001180000 | CD0003893000 | CD0003994003 | CD0003997013 | CD0004001009 | CD0004005006 |
| CD0000024000 | CD0000106000  | CD0001181000 | CD0003894000 | CD0003994004 | CD0003998000 | CD0004001010 | CD0004005008 |
| CD0000025000 | CD0000107000  | CD0001182000 | CD0003896000 | CD0003994005 | CD0003998001 | CD0004001011 | CD0004005009 |
| CD0000026000 | CD0000108000  | CD0001183000 | CD0003897000 | CD0003994006 | CD0003998002 | CD0004001012 | CD0004005010 |
| CD0000027000 | CD0000109000  | CD0001184000 | CD0003898000 | CD0003994007 | CD0003998003 | CD0004001013 | CD0004005011 |
| CD0000028000 | CD0000110000  | CD0001185000 | CD0003900000 | CD0003994008 | CD0003998004 | CD0004002000 | CD0004005012 |
| CD0000029000 | CD0000111000  | CD0001186000 | CD0003930000 | CD0003994009 | CD0003998005 | CD0004002001 | CD0004005013 |
| CD0000030000 | CD0000112000  | CD0001187000 | CD0003991000 | CD0003994010 | CD0003998006 | CD0004002002 | CD0004006000 |
| CD0000031000 | CD0000113000  | CD0001188000 | CD0003991001 | CD0003994011 | CD0003998007 | CD0004002003 | CD0004006001 |
| CD0000032000 | CD0000114000  | CD0001189000 | CD0003991002 | CD0003994012 | CD0003998008 | CD0004002004 | CD0004006002 |
| CD0000034000 | CD0000115000  | CD0001190000 | CD0003991003 | CD0003994013 | CD0003998009 | CD0004002005 | CD0004006003 |
| CD0000035000 | CD0000116000  | CD0001191000 | CD0003991004 | CD0003995000 | CD0003998010 | CD0004002006 | CD0004006004 |
| CD0000036000 | CD0000117000  | CD0001192000 | CD0003991005 | CD0003995001 | CD0003998011 | CD0004002007 | CD0004006005 |
| CD0000037000 | CD0000118000  | CD0001193000 | CD0003991006 | CD0003995002 | CD0003998012 | CD0004002008 | CD0004006006 |
| CD0000038000 | CD0000119000  | CD0001194000 | CD0003991007 | CD0003995003 | CD0003998013 | CD0004002009 | CD0004006007 |
| CD0000039000 | CD0000120000  | CD0001195000 | CD0003991008 | CD0003995004 | CD0003999000 | CD0004002010 | CD0004006008 |
| CD0000040000 | CD0000121000  | CD0001196000 | CD0003991009 | CD0003995005 | CD0003999001 | CD0004002011 | CD0004006009 |
| CD0000041000 | CD0000122000  | CD0001197000 | CD0003991010 | CD0003995006 | CD0003999002 | CD0004002012 | CD0004006010 |
| CD0000042000 | CD0000123000  | CD0001198000 | CD0003991011 | CD0003995007 | CD0003999003 | CD0004002013 | CD0004006011 |
| CD0000043000 | CD0000124000  | CD0001199000 | CD0003991012 | CD0003995008 | CD0003999004 | CD0004003000 | CD0004006012 |
| CD0000044000 | CD0000125000  | CD0001200000 | CD0003991013 | CD0003995009 | CD0003999005 | CD0004003001 | CD0004006013 |
| CD0000045000 | CD0000126000  | CD0001201000 | CD0003992000 | CD0003995010 | CD0003999006 | CD0004003002 | CD0004244000 |
| CD0000047000 | CD0000127000  | CD0001202000 | CD0003992001 | CD0003995011 | CD0003999007 | CD0004003003 | CD0004676000 |
| CD0000048000 | CD0000128000  | CD0001203000 | CD0003992002 | CD0003995012 | CD0003999008 | CD0004003004 | CD0004677000 |
| CD0000049000 | CD00001152000 | CD0001204000 | CD0003992003 | CD0003995013 | CD0003999009 | CD0004003005 | CD0004678000 |
| CD0000050000 | CD0001153000  | CD0001205000 | CD0003992004 | CD0003996000 | CD0003999010 | CD0004003006 |              |
| CD0000051000 | CD0001154000  | CD0001206000 | CD0003992005 | CD0003996001 | CD0003999011 | CD0004003007 |              |
| CD0000052000 | CD0001155000  | CD0001207000 | CD0003992006 | CD0003996002 | CD0003999012 | CD0004003008 |              |
| CD0000053000 | CD0001156000  | CD0003668000 | CD0003992007 | CD0003996003 | CD0003999013 | CD0004003009 |              |
| CD0000054000 | CD0001157000  | CD0003669000 | CD0003992008 | CD0003996004 | CD0004000000 | CD0004003010 |              |

Figures:

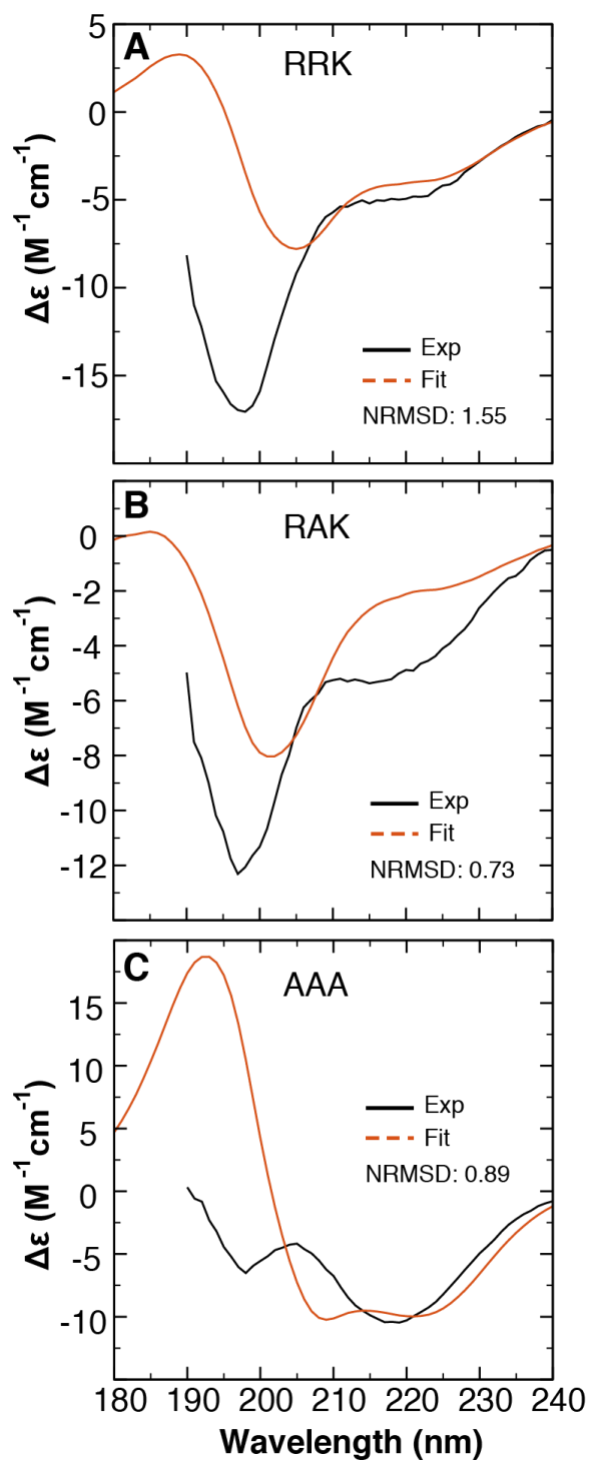

Figure S1 The calculated CD spectra derived from CAPITO for the CaMKII peptides are compared with the experimental data.

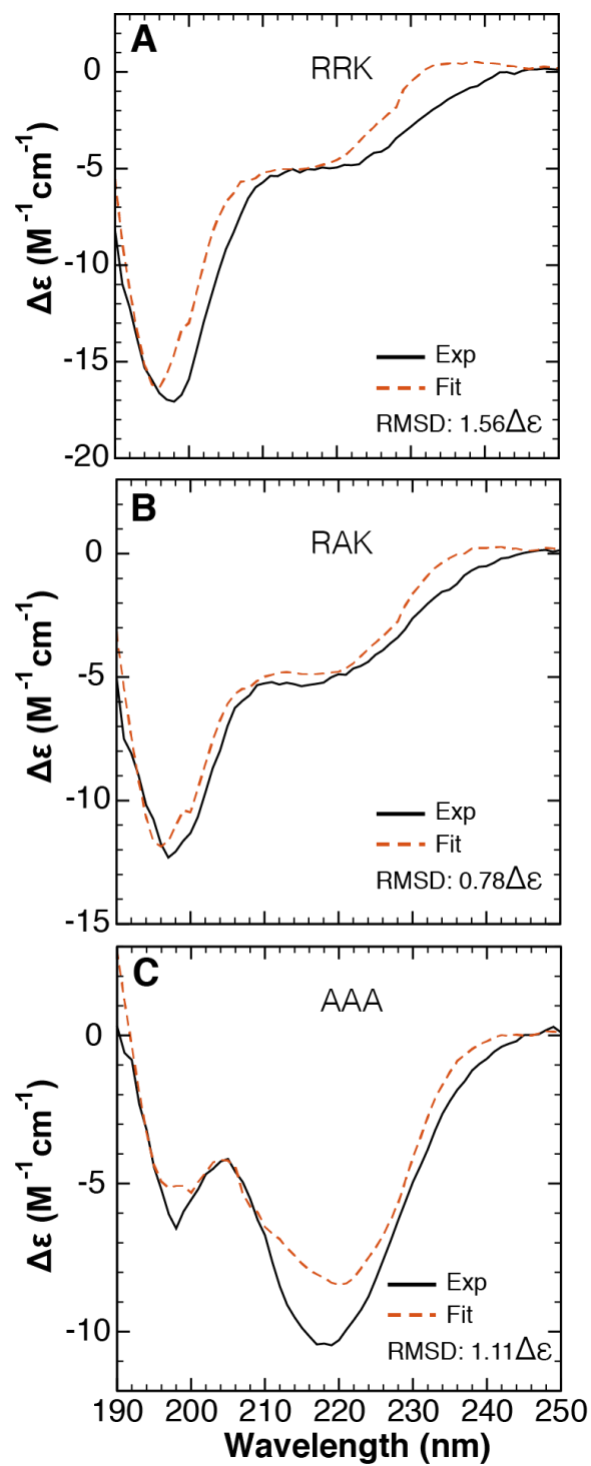

**Figure S2** The predicted CD spectra derived from BeStSel for the CaMKII peptides are compared with the experimental data.

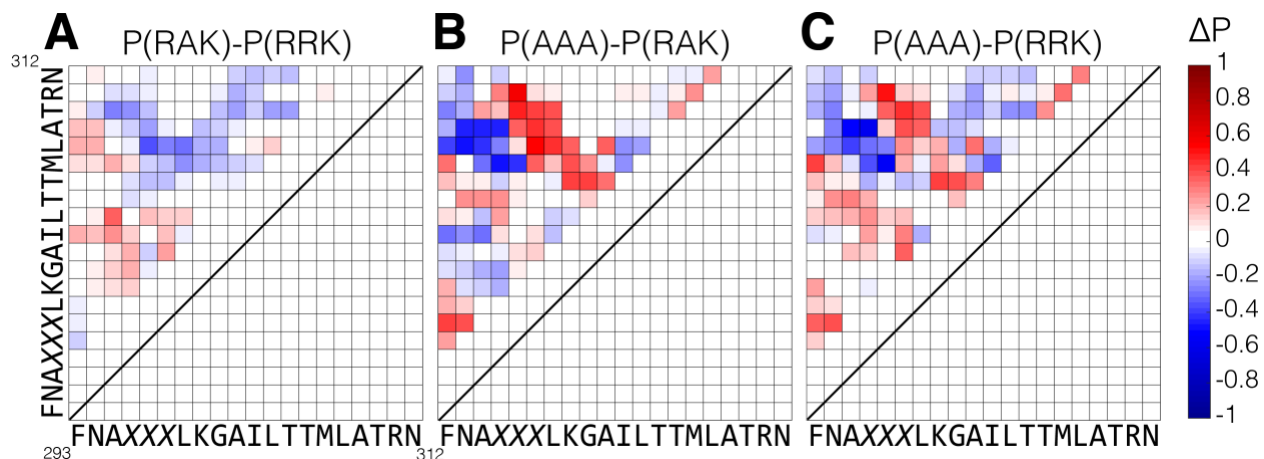

**Figure S3 Difference in the probability of contact formation between the CD-refined MD structures of CaMKII peptides.** Probability of contact formation are compared between peptide RAK and the wildtype RRK (a), between peptides AAA and RAK (b), and between peptide AAA and the wildtype RRK (c). The amino acid sequences are provided as the axis labels (X refers to any of the three residues RRK/RAK/AAA for corresponding peptides). The criteria of the contact formation can be found in the Method section in the main text.

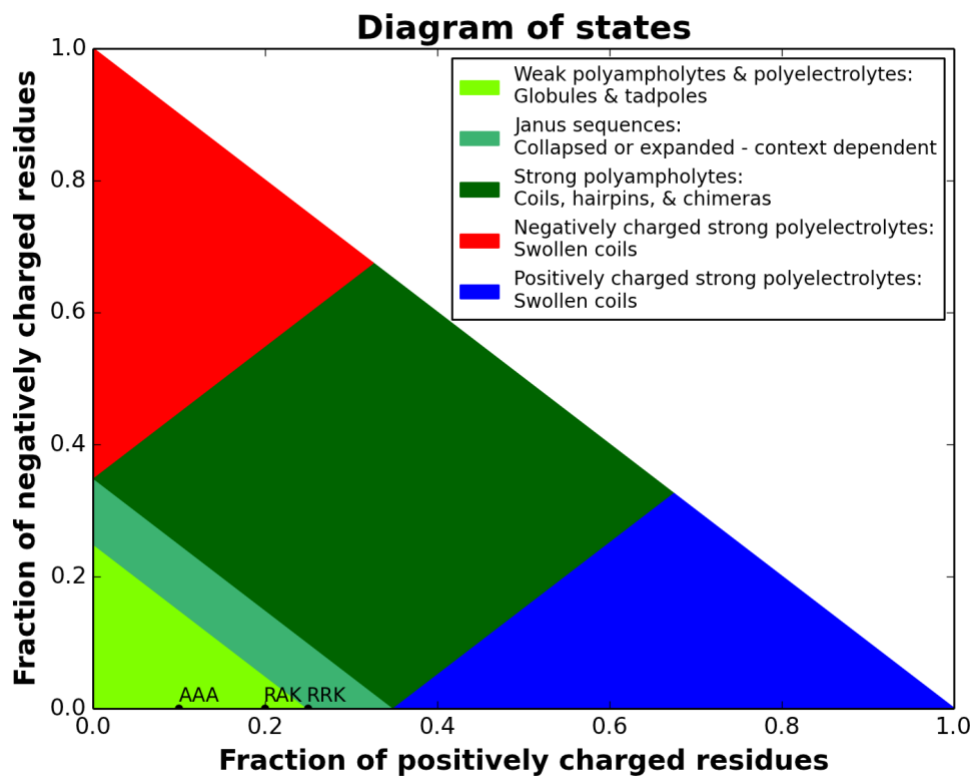

**Figure S4 Diagram of states from CIDER analysis for the CaMKII peptides.** The distribution of charged residues is indicative of ensemble conformation. RRK is in line with an expanded conformational ensemble, whereas RAK and AAA are predicted to more ordered.



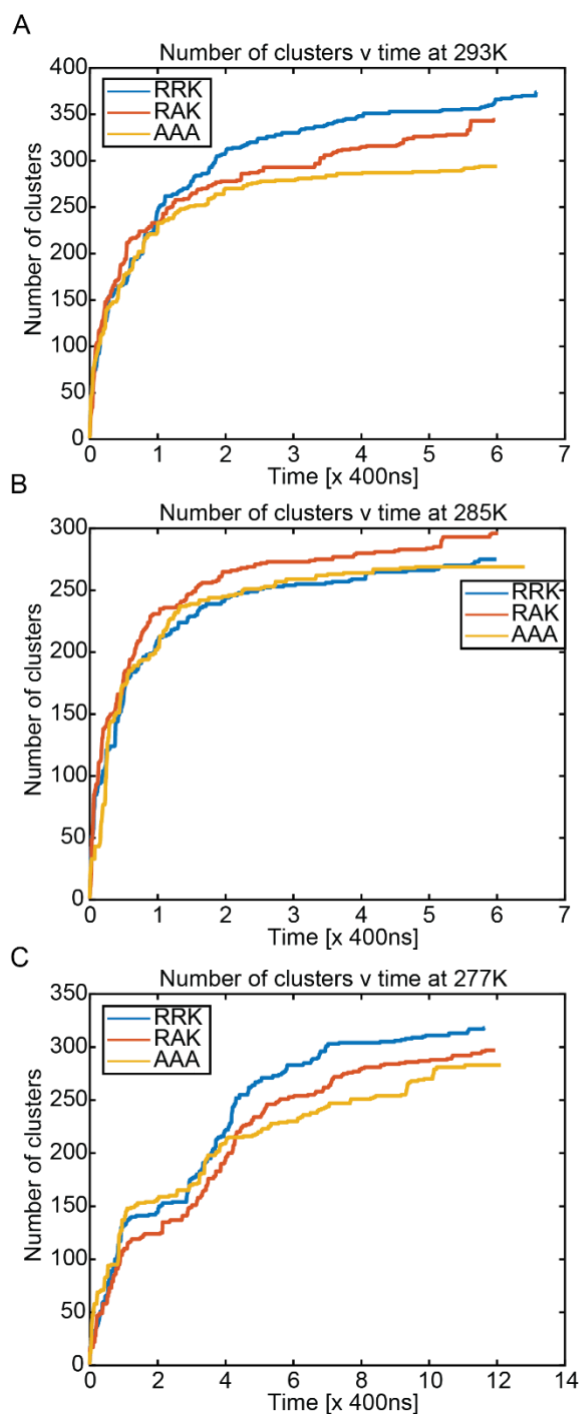

**Figure S5 Clustering analysis for the MD trajectories of CaMKII peptides.** Number of clusters versus accumulated time were plotted for RRK, RAK and AAA peptides at simulation temperatures of (A) 277K, (B) 285K and (C) 293K. Trajectories belonging to each peptide/temperature combination are concatenated together in chronological order and clustered using an algorithm described by Daura et al. [3]. A cutoff of 2.5 angstroms is used to distinguish clusters by root mean square distance of backbone  $C_{\alpha}$  atoms. Clusters were generated using every 10<sup>th</sup> frame from the MD trajectories.

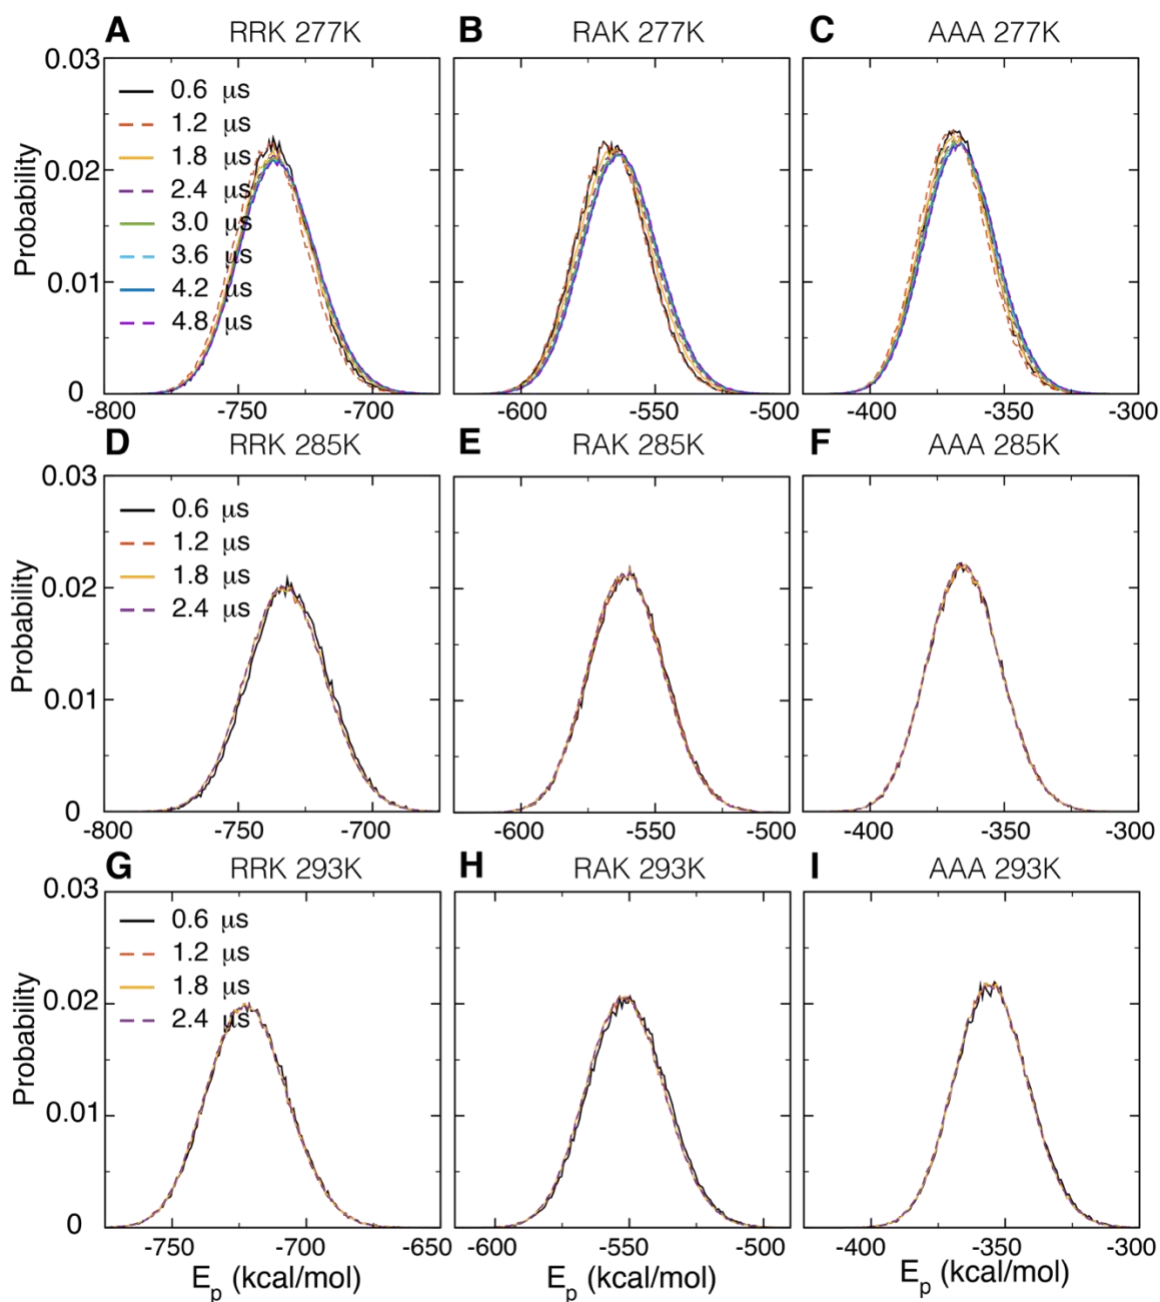

**Figure S6 Probability distribution of the potential energy ( $E_p$ ) for the MD trajectories of CaMKII peptides.** The probability distribution of the potential energy for the peptides were compared for each peptide at temperatures of 277K (A, B, C, respectively), 285 K (D, E, F, respectively), and 293 K (G, H, I, respectively) were plotted at accumulated simulation time to show the convergence of the MD simulations.

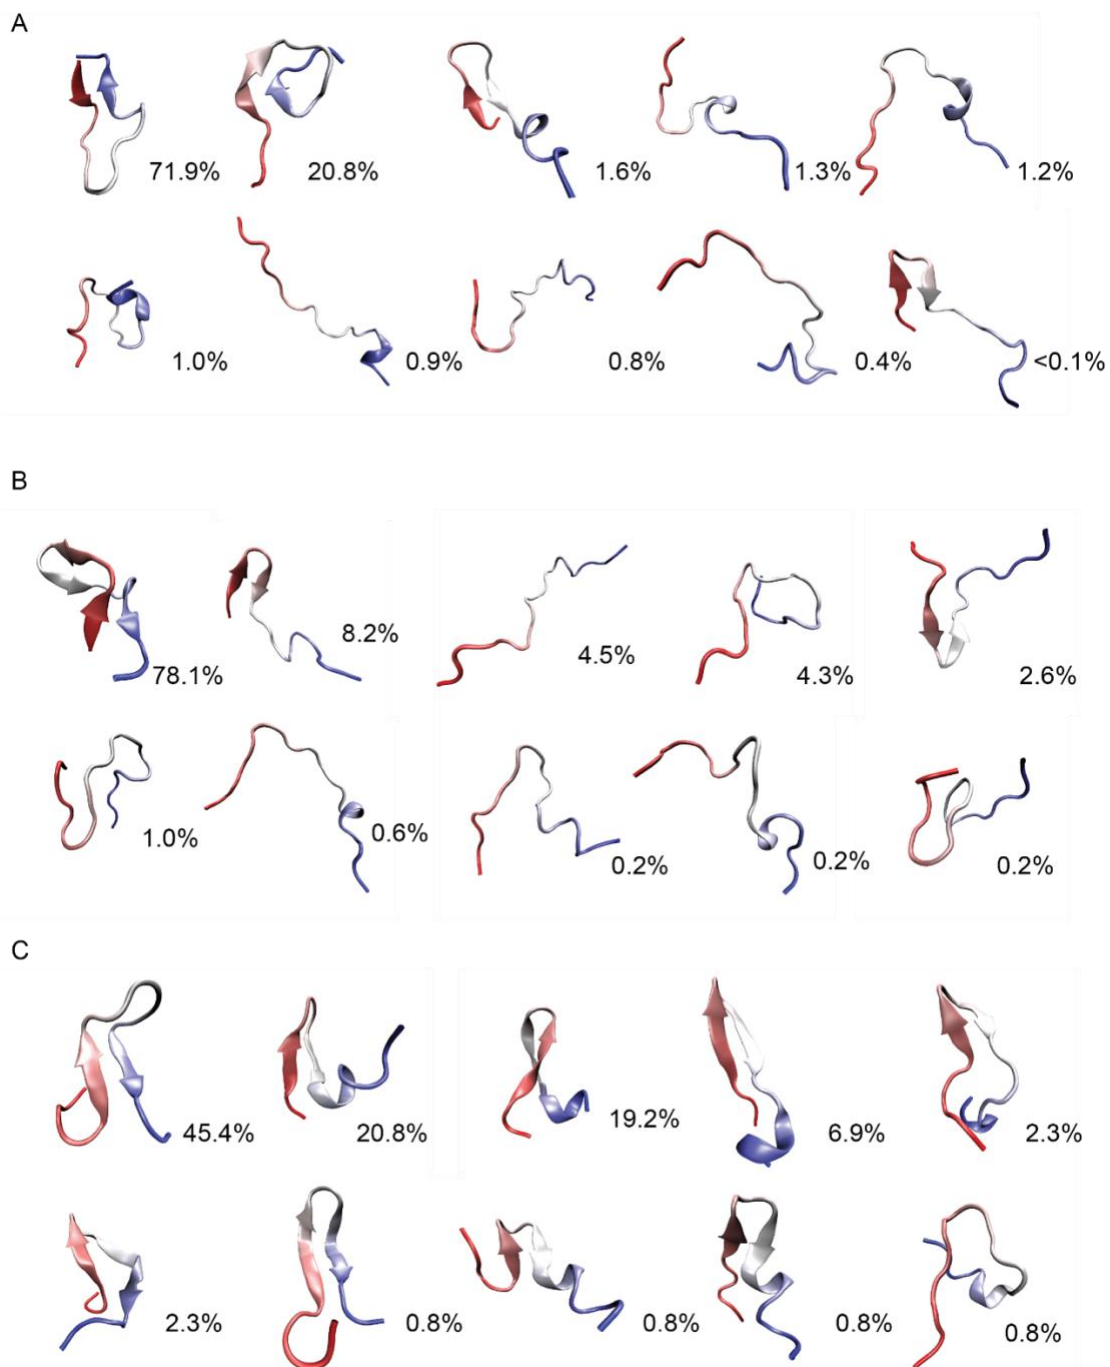

**Figure S7 Sample conformations of generated ensembles using CPPTRAJ.** CaMKII peptide ensembles are generated by selecting MD trajectory frames from the 293K runs with secondary structure fractions that match the NN-LSQ CD deconvolution results. 10 example structures are produced through Hieragglo clustering of the extracted ensemble using backbone  $C\alpha$  RMS distances. The center structures from 10 generated clusters are shown for (A) RRK, (B) RAK, and (C) AAA to illustrate the effect that each mutation has on the overall conformational behavior. The peptides are colored according to atomic index, from N-terminus (red) to C-terminus (blue), and cluster percentages are shown.

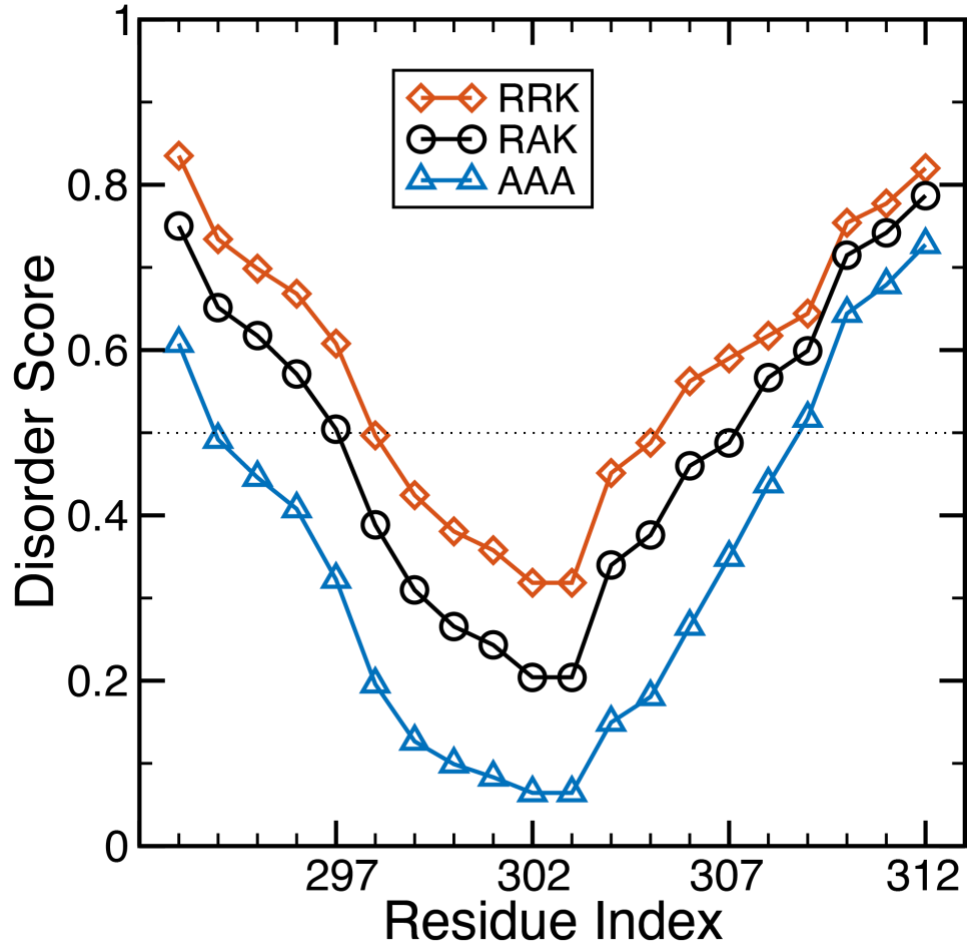

**Fig. S8 Computational prediction of unstructured regions in CaMKII peptides using the IUPred web server.** The predictor score is plotted against the residue number. The threshold is 0.5 and residues with a higher and lower score are considered to be in disordered and ordered regions, respectively.

**Texts:**

**1. Equations for CIDER analysis:**

$$\sigma = \frac{(f_+ - f_-)^2}{(f_+ + f_-)}$$

$$\sigma_i = \frac{(f_+ - f_-)_i^2}{(f_+ + f_-)_i}$$

$$\delta = \frac{\sum_{i=1}^N (\sigma_i - \sigma)^2}{N}$$

$$\kappa = \frac{\delta}{\delta_{max}}$$

where,

$\sigma$  is the overall charge asymmetry;

$f_+/f_-$  is the fraction of positively/negatively charged residues;

$\sigma_i$  is the charge asymmetry for blob segment  $i$ ;

$\delta$  is the squared deviation between the segmented blobs and the overall charge asymmetry;

$\delta_{max}$  is the maximum value of  $\delta$  in all possible sequences for a given amino-acid composition;

$N$  is total number of residues.

**2. Convergence analysis for the MD simulations**

Obtaining a well-sampled MD trajectory is crucial for the success of our proposed IDP ensemble generation method, therefore we ensure a well sampled conformation space through convergence analysis of the MD trajectories.

- a. We use clustering analysis (Figure S5) to determine whether the majority of conformations have been sampled in our production runs. The number of clusters generated with respect to simulation time can determine the probably that the system will sample new or previously sampled conformations with additional simulation time. We observed that the change in cluster number with respect to time approaches 0 towards the end of each peptide/temperature trajectory, indicating that the majority of conformations have been sampled. A drawback to this method is that the different clustering cutoffs will change the analysis results. Larger cutoffs will not be able to distinguish minor changes in the backbone structure, resulting in small numbers of clusters and faster convergence. Similarly, smaller cutoffs are too strict and may over separate structures that should be grouped together, erroneously indicating that the trajectory diverges.
- b. In addition to clustering analysis, the histograms of the distributions of the potential energy of the peptides at temperatures 277 K, 285 K, and 293 K clearly show convergence was

approached with increasing accumulated time (Figure S6). To quantically determine how the potential energy distributions change with respect to simulation time, we applied Kullback–Leibler (KL) divergence [4, 5] (Table S5). KL divergence between the probability distribution P (reference) and Q is defined as follows,

$$KL(P, Q) = - \sum_x P(x) \ln \frac{Q(x)}{P(x)}$$

KL divergence analysis indicates a well-sampled trajectory if the changes between potential energy distributions at different times is small. A value of zero indicates that the two distributions are identical. We systematically calculated the KL divergence between the distributions of accumulated trajectories at a simulation time interval of 0.6  $\mu$ s. The results of our analysis indicate that all trajectories have reached convergence since the KL divergence between potential energy distributions approach to a small value of 0.01 towards the end of our simulation runs.

### 3. Clustering extracted peptide ensembles using CATS

Due to the large number of ensemble frames extracted from our MD trajectories, it became necessary to cluster the structures so that identifying features could be possible. In a previous study [6], we developed a clustering algorithm that was designed specifically for IDPs. A requirement of the algorithm is that the trajectory dihedral angle distributions be Gaussian-like. A histogram of the  $\phi$  and  $\psi$  dihedral angles of each peptide residue (40 in total) is generated using a bin size of 3.6°. To reduce noise in the distributions, we use a Gaussian weighted moving average filter to smooth the data. We then fit Gaussian curves to the distributions and input the resulting fitting data into CATS. For our analysis of RRK, RAK and AAA, we used an  $\epsilon$  value of 3, and 4-coordinate relaxation for all initial clusters with populations under 10% of the total ensemble size. We chose to display the top 10 clusters for each peptide ensemble, which varied with respect to accumulative size with RRK having the lowest total population and AAA having the highest total population in 10 clusters.

### 4. Validation of NN-LSQ deconvolution with SDP48 data set

The performance of NN-LSQ, CONTIN/LL, SELCON3, and CDSSTR deconvolution methods using SDP48 data set was evaluated using RMSD ( $\delta$ ) and correlation ( $r$ ) coefficients defined by Woody and Sreerama [7, 8] based on 411 protein CD spectra obtained from the Protein Circular Dichroism Data Base (PCDDDB) [9] with known Protein Data Bank (PDB) entries. To determine the effect of secondary structure content on the performance of each deconvolution method, the performance coefficients are calculated

for subsets of proteins with varying amounts of helix, strand, turn and unordered structure content.

### Supplementary References

1. Wiedemann, C., P. Bellstedt, and M. Gorlach, *CAPITO--a web server-based analysis and plotting tool for circular dichroism data*. *Bioinformatics*, 2013. **29**(14): p. 1750-7.
2. Williams, R.M., et al., *The protein non-folding problem: amino acid determinants of intrinsic order and disorder*. *Pac Symp Biocomput*, 2001: p. 89-100.
3. Daura, X., et al., *Peptide folding: When simulation meets experiment*. *Angewandte Chemie-International Edition*, 1999. **38**(1-2): p. 236-240.
4. Kullback, S. and R.A. Leibler, *On Information and Sufficiency*. *Ann. Math. Statist.*, 1951. **22**(1): p. 79-86.
5. Eguchi, S. and J. Copas, *Interpreting Kullback–Leibler divergence with the Neyman–Pearson lemma*. *Journal of Multivariate Analysis*, 2006. **97**(9): p. 2034-2040.
6. Ezerski, J.C. and M.S. Cheung, *CATS: A Tool for Clustering the Ensemble of Intrinsically Disordered Peptides on a Flat Energy Landscape*. *J Phys Chem B*, 2018. **122**(49): p. 11807-11816.
7. Sreerama, N. and R.W. Woody, *Estimation of protein secondary structure from circular dichroism spectra: comparison of CONTIN, SELCON, and CDSSTR methods with an expanded reference set*. *Anal Biochem*, 2000. **287**(2): p. 252-60.
8. Sreerama, N., S.Y. Venyaminov, and R.W. Woody, *Estimation of protein secondary structure from circular dichroism spectra: inclusion of denatured proteins with native proteins in the analysis*. *Anal Biochem*, 2000. **287**(2): p. 243-51.
9. Whitmore, L., et al., *PCDDDB: the Protein Circular Dichroism Data Bank, a repository for circular dichroism spectral and metadata*. *Nucleic Acids Res*, 2011. **39**(Database issue): p. D480-6.
10. Dosztanyi, Z., et al., *IUPred: web server for the prediction of intrinsically unstructured regions of proteins based on estimated energy content*. *Bioinformatics*, 2005. **21**(16): p. 3433-4.
